# Supplementary material
Source: publisher figshare collection journal article supplement (https://karger.figshare.com/articles/dataset/_/9311888)
Supplement: Supplementary file 1 [file 1]

**SUPPLEMENTAL TABLE 1. Scanning parameters (3.0 Tesla)**

|                        | pre- and postcontrast<br>T1 FSE | pre- and postcontrast<br>3D-FLAIR | 3D T2-FFSP | delayed postcontrast<br>3D FLAIR Brain View |
|------------------------|---------------------------------|-----------------------------------|------------|---------------------------------------------|
| Plane                  | axial                           | axial                             | axial      | axial                                       |
| TR (ms)                | 500                             | 6000                              | 1500       | 7600                                        |
| TE (ms)                | 10                              | 350                               | 194        | 345                                         |
| TI (ms)                | /                               | 2350                              | /          | 2100                                        |
| Fat saturation         | SPIR                            | SPIR                              | /          | SPAIR                                       |
| TSE factor             | 3                               | 182                               | 40         | 100                                         |
| Flip angle             | 90                              | 90                                | 90         | 90                                          |
| Slice thickness (mm)   | 1.5                             | 1                                 | 0.6        | 0.6                                         |
| Slices (no.)           | 15                              | 30                                | 22         | 40                                          |
| FOV (mm <sup>2</sup> ) | 180x160                         | 230x190                           | 140x140    | 200x255                                     |
| Matrix                 | 256x205                         | 232x229                           | 264x248    | 250x252                                     |
| Parallel imaging       | no                              | yes                               | no         | yes                                         |
| Averages               | 4                               | 6                                 | 1          | 4                                           |
| Scan time              | 2min 51sec                      | 10min 06sec                       | 6min 35sec | 9min 15sec                                  |

FSE: fast spin echo; FLAIR: fluid attenuated inversion recovery; FFSP: steady-state free precession; TR: time of repetition; TE: time of echo; FOV: field of view; SPIR: spectral presaturation with inversion recovery; SPAIR: spectral attenuated inversion recovery
