# Supplementary material
Source: publisher figshare collection journal article supplement (https://karger.figshare.com/articles/dataset/_/9311888)
Supplement: Supplementary file 2 [file 1]

**SUPPLEMENTAL TABLE 2. Non-syndromic deafness A9 (DFNA9) affected patients' genetic profile**

| Patient n # | Aminoacid mutation | Nucleotide mutation | Protein domain      | Exon |
|-------------|--------------------|---------------------|---------------------|------|
| 1 (I)       | G88A               | c.263 G>C           | factor C homologous | 5    |
| 2 (I)       | G88A               | c.263 G>C           | factor C homologous | 5    |
| 3 (I)       | G88A               | c.263 G>C           | factor C homologous | 5    |
| 4           | W117R              | c.349 T>C           | factor C homologous | 5    |

I: patients are siblings (brother/sister)
